# Supplementary material for: Design of energy band alignment at the Zn1−xMgxO/Cu(In,Ga)Se2 interface for Cd-free Cu(In,Ga)Se2 solar cells
Source: Royal Society of Chemistry journal article supplement (doi:10.1039/c2cp40355b), 2012-01-01
Supplement: c2cp40355b.pdf [file c2cp40355b.pdf]

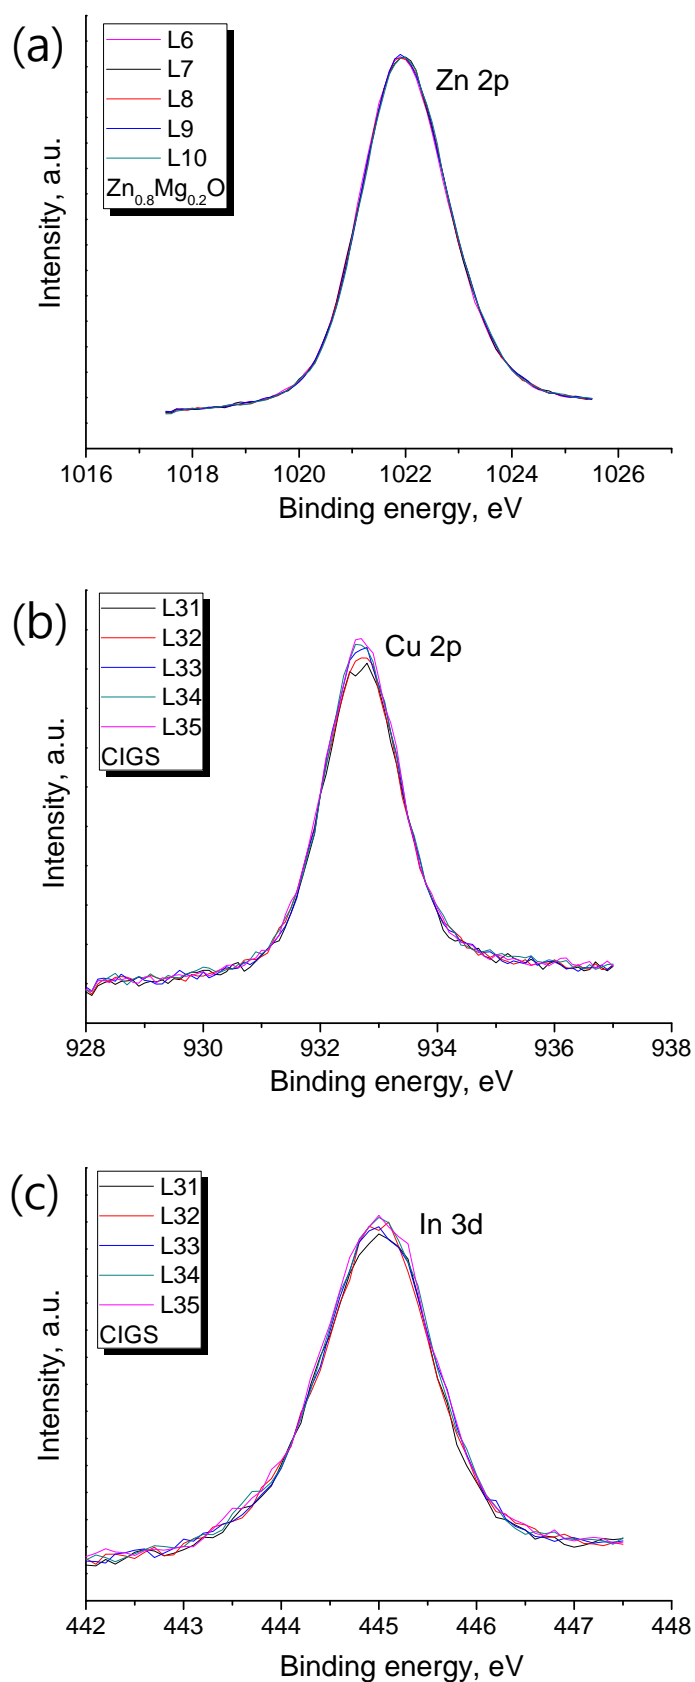

Figure S1. XPS peaks for (a) Zn 2p (L6-10), (b) Cu 2p (L31-35), and (c) In 3d (L31-35) core levels from the bulk  $\text{Zn}_{0.8}\text{Mg}_{0.2}\text{O}$  region and bulk CIGS region. No change of peak positions and their FWHM values indicates that there is no sample damage during sputter etching.
